# Supplementary material for: Landscape burning facilitated Aboriginal migration into Lutruwita/Tasmania 41,600 years ago
Source: PubMed Central journal article supplement — Sci Adv. 2024 Nov 15;10(46):eadp6579. doi: 10.1126/sciadv.adp6579 (PMC11567000; doi:10.1126/sciadv.adp6579), 2024-11-15
Supplement: sciadv.adp6579_sm.pdf [file sciadv.adp6579_sm.pdf]

Supplementary Materials for  
**Landscape burning facilitated Aboriginal migration into Lutruwita/Tasmania  
41,600 years ago**

Matthew A. Adeleye *et al.*

Corresponding author: Matthew A. Adeleye, [ma2073@cam.ac.uk](mailto:ma2073@cam.ac.uk)

*Sci. Adv.* **10**, eadp6579 (2024)  
DOI: 10.1126/sciadv.adp6579

**This PDF file includes:**

Supplementary Text  
Figs. S1 to S5  
Table S1

## Supplementary Text

### Chronology considerations

Reworked or redistributed alluvial and aeolian sands are largely features of arid phases in the Furneaux Group during the Quaternary (1), including the last glacial maximum (LGM) (2). Bedrock sand characterized the base of laymina paywuta and likely marks the end of the arid Marine Isotope Stage (MIS)-4 and the onset of wetter conditions suitable for lagoon formation at the beginning of MIS-3. Thus, the bottom depth (394 cm) of laymina paywuta is taken as the start of MIS-3 (~57 ka) in the age-depth model, when moisture conditions were suitable for organic preservation at the site. The relatively arid MIS-4 (3, 4) would likely have supported cold adapted herbaceous plant communities as the case later during the LGM. This reflects in the greater abundance of herbaceous pollen in the bottom 9 cm of Emerald Swamp (later referred to as 'Emerald') and is taken to indicate MIS-4, with the depth (280 cm) of major herbaceous community decline marking the boundary of MIS-4/MIS-3 in the age-depth model (Fig. 2). Out of the 24 radiocarbon dates obtained for laymina paywuta, six dates were suspected to be contaminated/mixed due to age reversals and 18 were used in building the age-depth model. There are no limestones around either of the coring sites and there is less likelihood of reservoir effects on the radiocarbon dates. Similarly, the age reversals in Emerald, especially at 185 and 255 cm, are also likely due to sediment mixing or contamination. However, no significant difference was observed after fitting the age-depth model with and without the reversed dates for Emerald, hence we present the former (Fig. 2). All radiocarbon date results are presented in Table S1 in supplementary information. The palaeoecological results presented here are focused on pre-LGM and LGM periods (~60–17 ka).

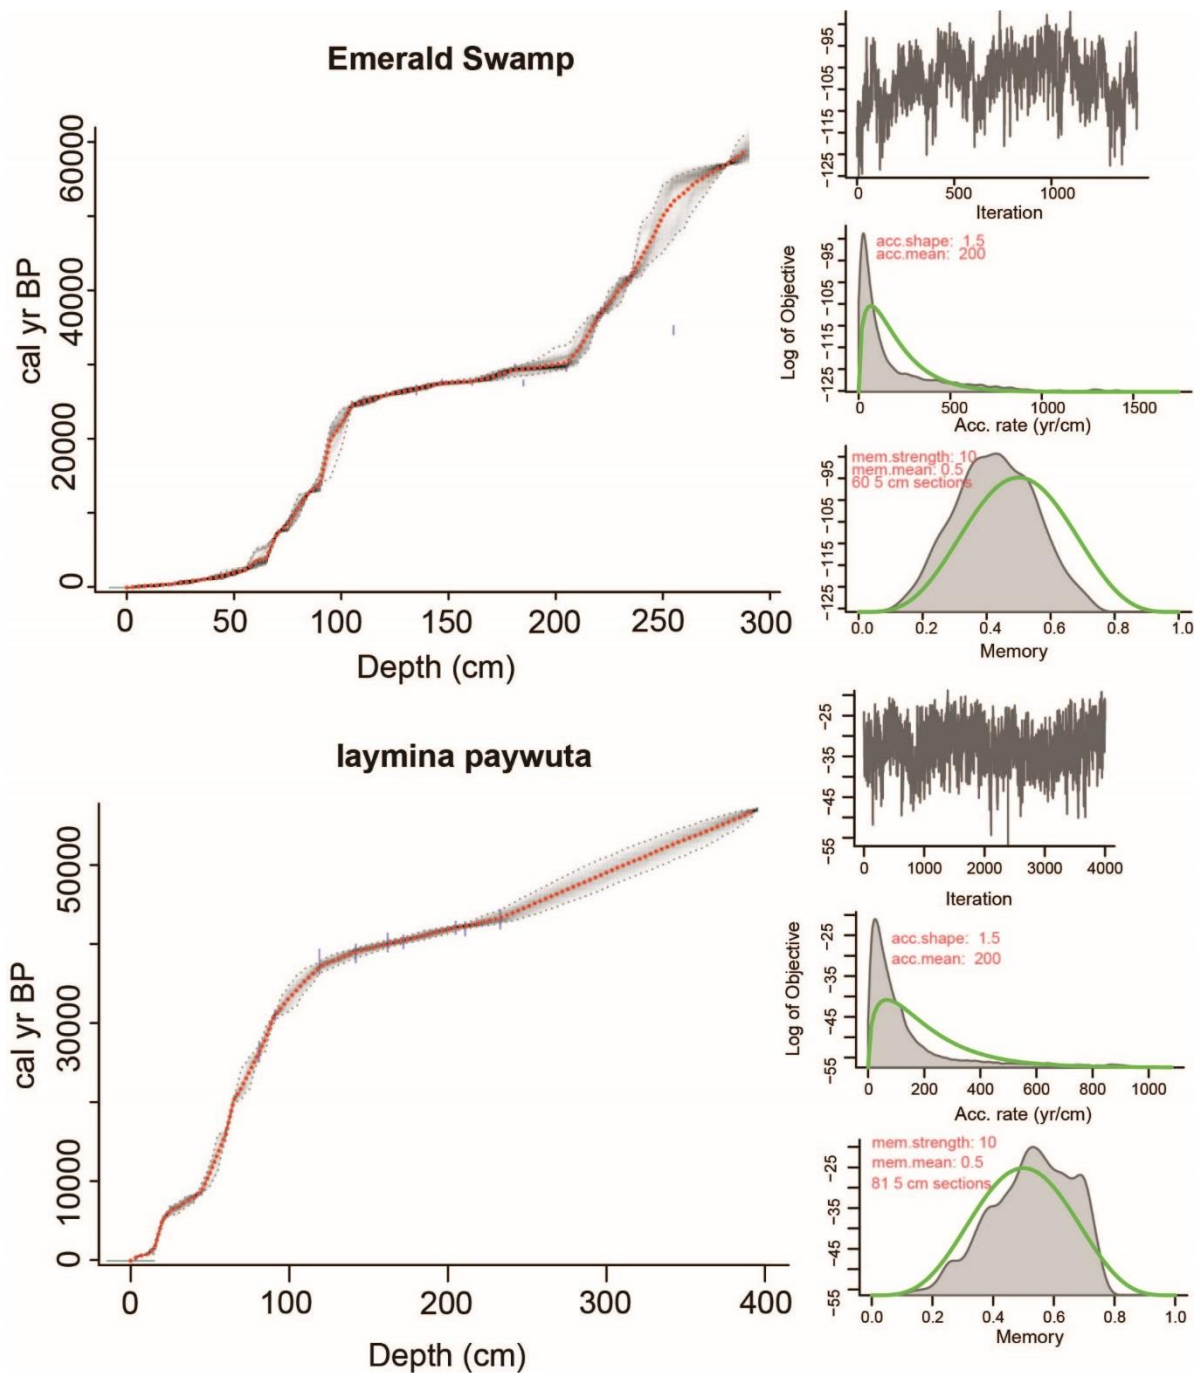

**Figure S1:** Bacon age-depth model out put for core sites showing calibrated  $^{14}\text{C}$  dates (purple), age-depth model (dark grey), 95% confidence intervals of calibrated range (light grey), single model based on the weighted mean age for each depth (red curve).

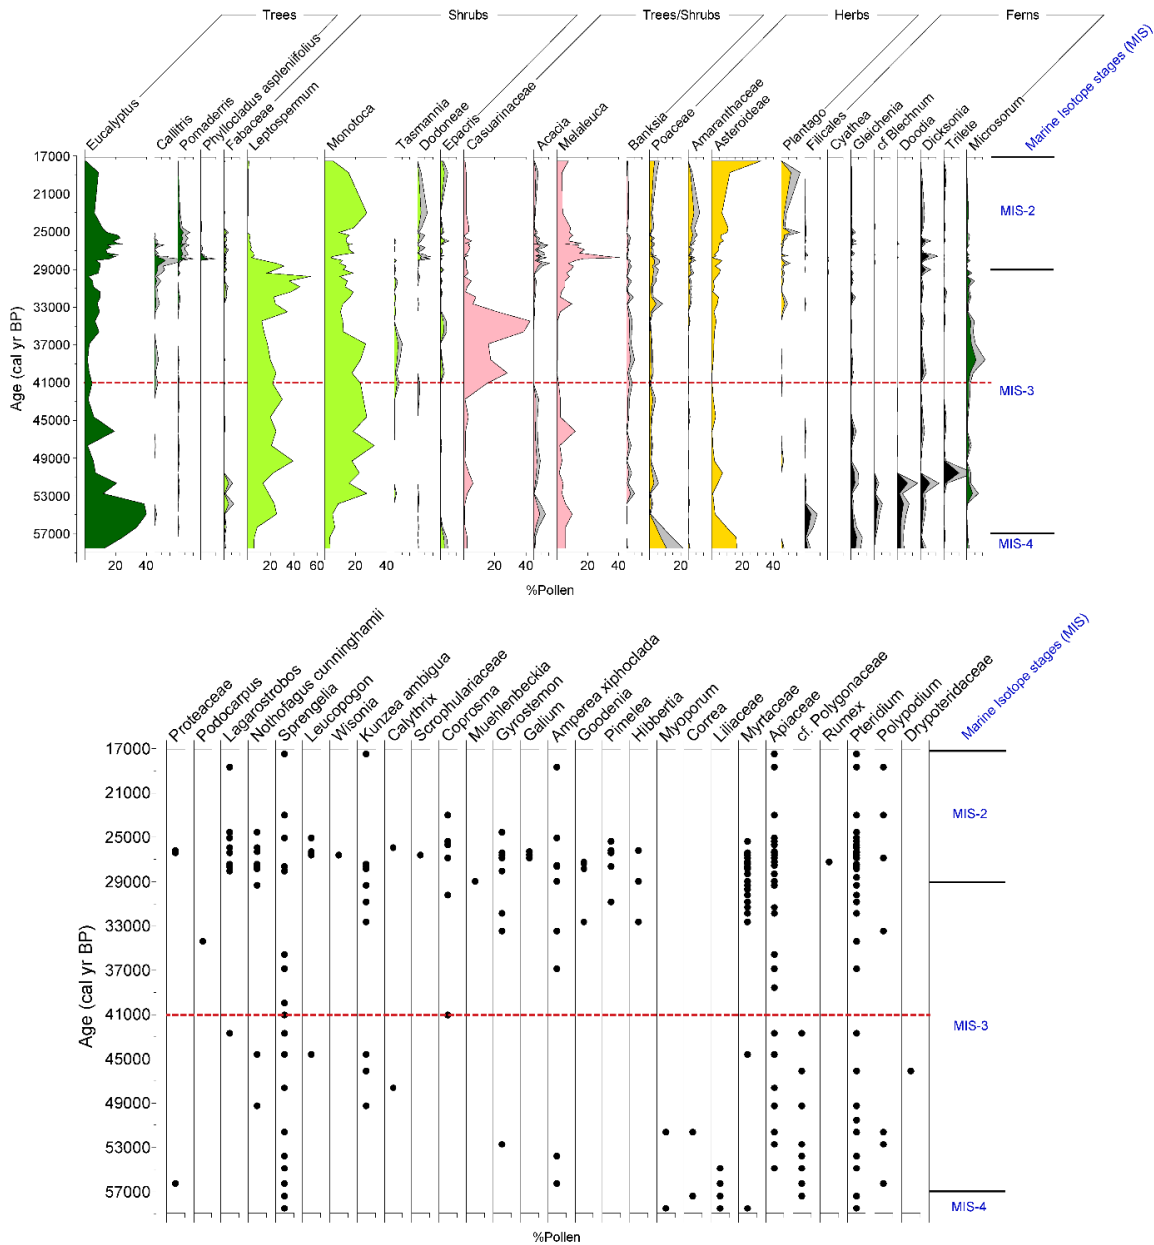

**Figure S2:** Full terrestrial pollen record for Emerald Swamp, western Bass Strait. Solid black circle indicates taxa occurrence in one sample or at <2% across the record. Grey-shades are  $\times 4$  exaggeration to enhance visibility. Red-shaded zone is the timing of human arrival in Tasmania/Lutruwita at  $\sim 41.6$  ka as identified in main text.

At Emerald Swamp, the MIS-4 – 3 transition is characterized by the replacement of herbs by *Eucalyptus*. *Eucalyptus* soon declines by  $\sim 53$  ka with the expansion of *Leptospermum* and *Monotoca* largely characterizing MIS-3. However, human arrival at  $\sim 41.6$  ka was accompanied by a major expansion of Casuarinaceae from  $\sim 41$  to 33 ka. *Eucalyptus* peaked briefly again between  $\sim 28$  and 25 ka. *Leptospermum* dropped out at this time with *Monotoca* and herbaceous taxa, especially Asterioideae dominating.

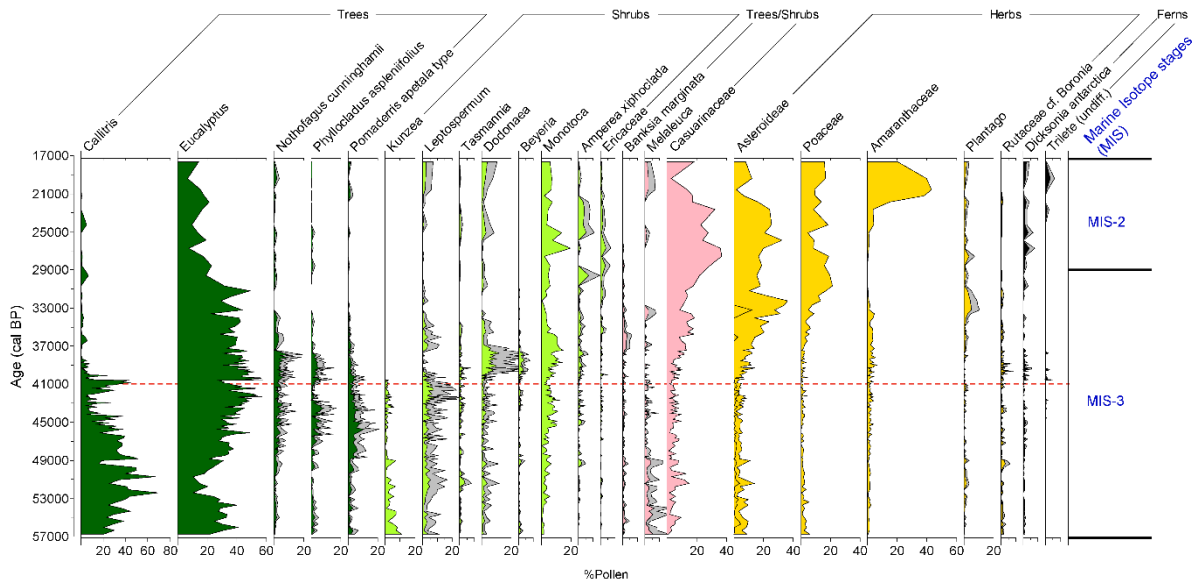

**Figure S3:** Full terrestrial pollen record of taxa >2% for laymina paywuta, eastern Bass Strait. Grey-shades are  $\times 4$  exaggeration to enhance visibility. Red-dotted line is the timing of human arrival on the eastern Bassin Land Bridge at  $\sim 41.6$  ka as identified in main text.

*Callitris* and *Eucalyptus* generally dominated the first half of MIS-3 at laymina paywuta, and human arrival at  $\sim 41.6$  ka features a collapse in *Callitris* abundance in favour of *Eucalyptus* in the area by  $\sim 41$  ka. *Eucalyptus* declines in MIS-2, with the expansion of herbs and Casuarinaceae.

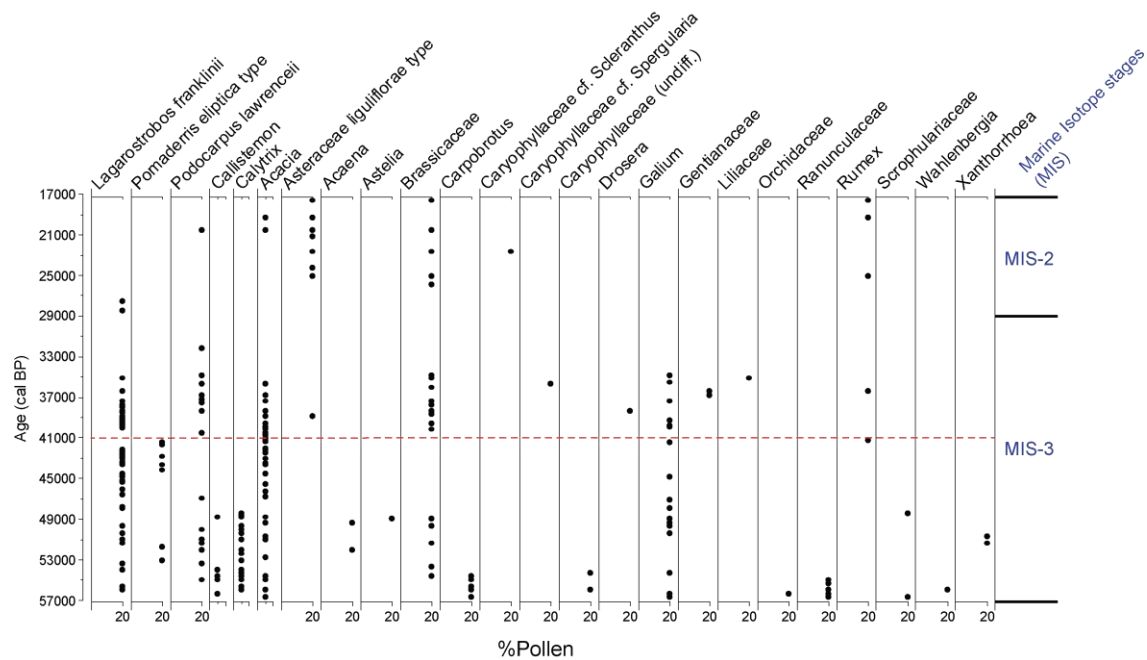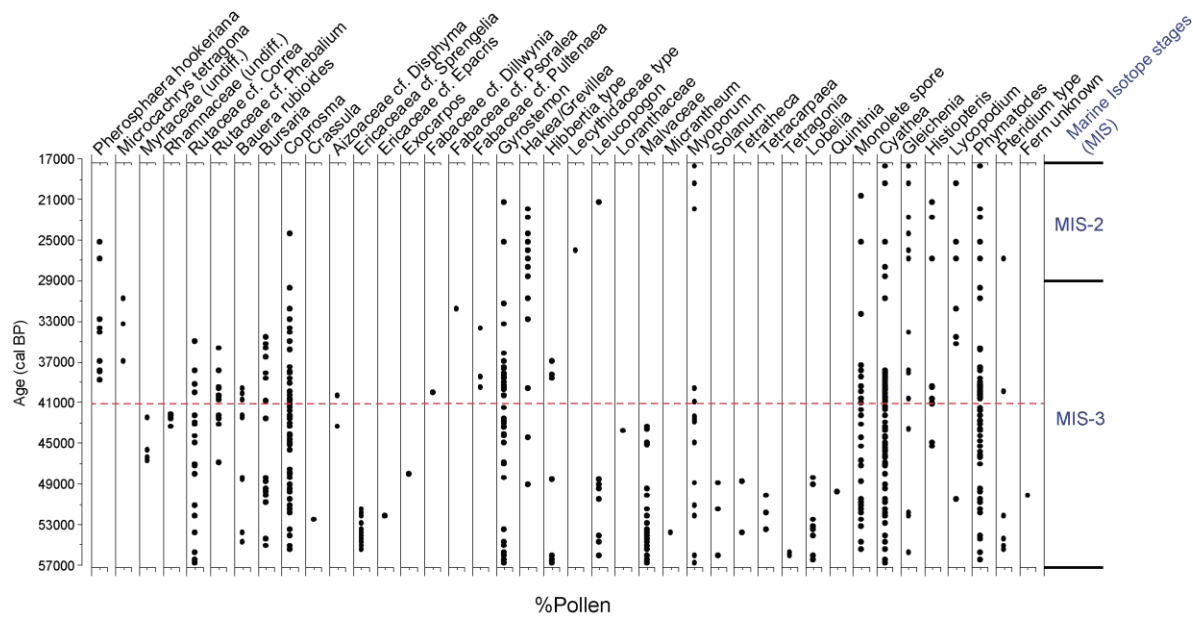

**Figure S4:** Terrestrial pollen record of taxa occurrence in one sample or at  $< 2\%$  in laymina paywuta record. Red-dotted line is the timing of human arrival on the eastern Basin Land Bridge at  $\sim 41.6$  ka as identified in main text.

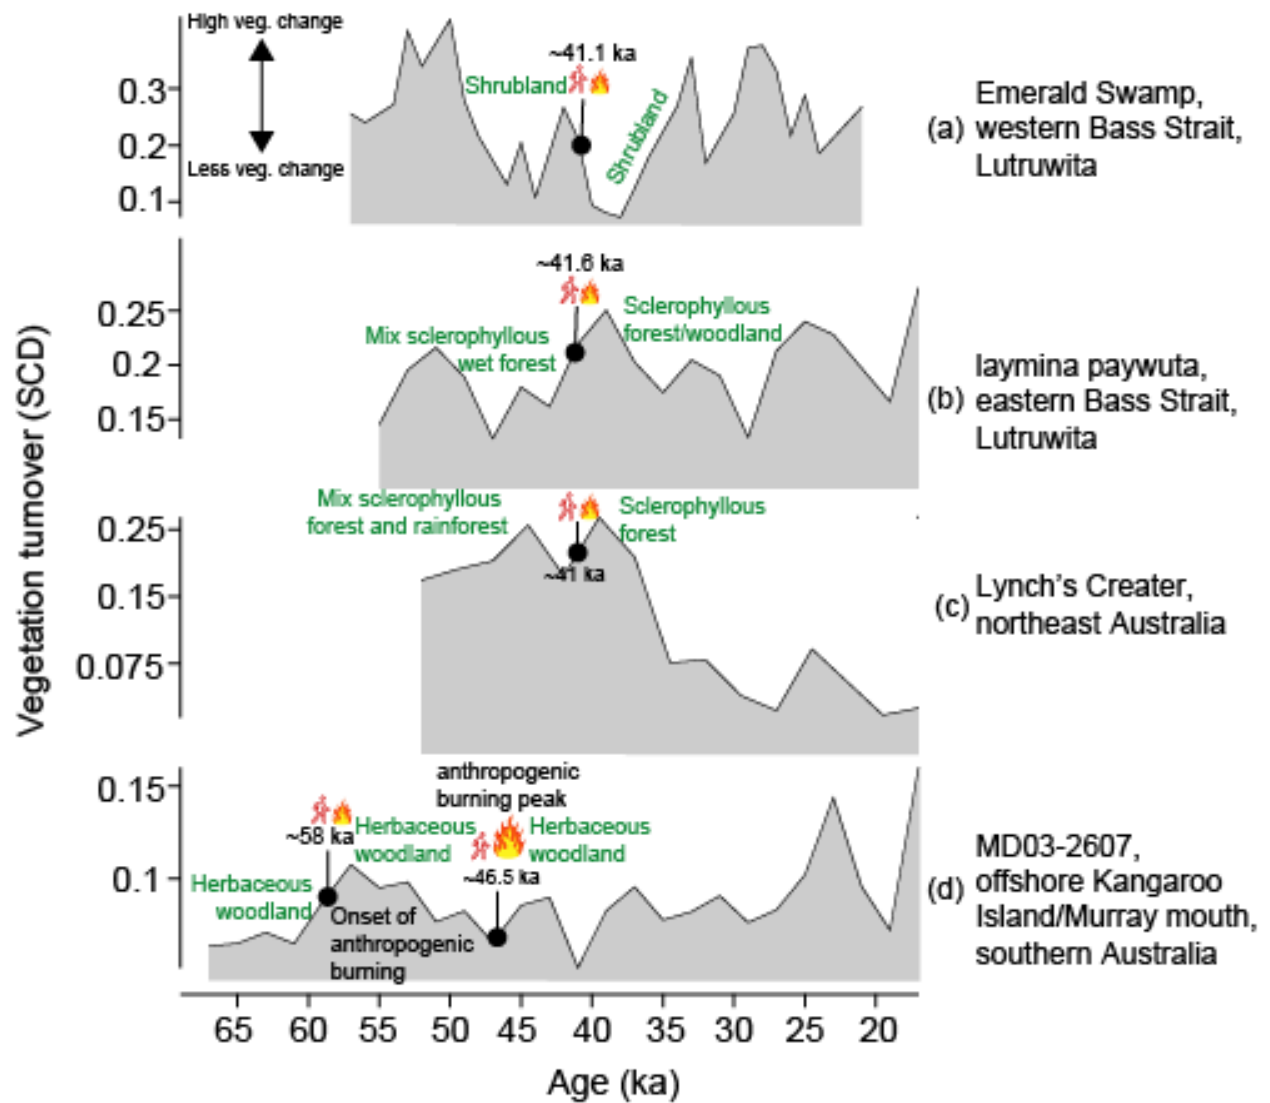

**Figure S5:** Vegetation turnover in Tasmanian/Lutruwitan sites compared to that of the Australian mainland (5, 6).

**Table S1:** AMS radiocarbon dates of bulk sediment for laymina paywuta and Emerald Swamp, Bass Strait, Tasmania/Lutruwita, measured at Direct AMS, Washington and Australian Nuclear Science and Technology Organization (ANSTO). Dates in italics are those excluded when building laymina paywuta age-depth model. Note: ‘Depth’ is lower boundary and thickness is 1 cm, so ‘0 cm’ is ‘0-1 cm’ and so on.

| Site                   | LabID         | Lab          | <sup>14</sup> C yr bp | Error (1 $\sigma$ ) | Depth (cm) | Calendar age range   |
|------------------------|---------------|--------------|-----------------------|---------------------|------------|----------------------|
| laymina paywuta        | Core top      |              | -66                   | 1                   | 0          | -                    |
| laymina paywuta        | D-AMS 028548  | DirectAMS    | 236                   | 22                  | 2.5        | 147 - 297            |
| laymina paywuta        | D-AMS 028549  | DirectAMS    | 383                   | 24                  | 4          | 323 - 489            |
| laymina paywuta        | D-AMS 028550  | DirectAMS    | 552                   | 25                  | 5.5        | 505 - 549            |
| laymina paywuta        | D-AMS 028551  | DirectAMS    | 854                   | 24                  | 10         | 676 - 765            |
| laymina paywuta        | D-AMS 028552  | DirectAMS    | 1242                  | 23                  | 12         | 1058 - 1177          |
| <i>laymina paywuta</i> | <i>OZY557</i> | <i>ANSTO</i> | <i>6155</i>           | <i>45</i>           | <i>8</i>   | <i>6855 - 7161</i>   |
| laymina paywuta        | OZT383        | ANSTO        | 4890                  | 45                  | 22         | 5472 - 5714          |
| laymina paywuta        | OZY558        | ANSTO        | 10590                 | 100                 | 33         | 12093 - 12736        |
| laymina paywuta        | OZT384        | ANSTO        | 7600                  | 30                  | 42         | 8218 - 8424          |
| laymina paywuta        | OZT385        | ANSTO        | 13465                 | 45                  | 60         | 16000 - 16333        |
| laymina paywuta        | OZY559        | ANSTO        | 15440                 | 60                  | 63         | 18361 - 18848        |
| <i>laymina paywuta</i> | <i>OZT386</i> | <i>ANSTO</i> | <i>12800</i>          | <i>45</i>           | <i>72</i>  | <i>15053 - 15419</i> |
| laymina paywuta        | OZY560        | ANSTO        | 22060                 | 270                 | 81         | 25845 - 26980        |
| laymina paywuta        | OZY561        | ANSTO        | 26940                 | 130                 | 91         | 30929 - 31206        |
| <i>laymina paywuta</i> | <i>OZT387</i> | <i>ANSTO</i> | <i>27310</i>          | <i>90</i>           | <i>110</i> | <i>31111 - 31536</i> |
| laymina paywuta        | OZY562        | ANSTO        | 33000                 | 230                 | 119        | 36747 - 38511        |
| <i>laymina paywuta</i> | <i>OZY563</i> | <i>ANSTO</i> | <i>39060</i>          | <i>290</i>          | <i>132</i> | <i>42394 - 42897</i> |
| laymina paywuta        | OZT388        | ANSTO        | 34040                 | 140                 | 142        | 38748 - 39556        |



|         |          |           |       |     |     |               |
|---------|----------|-----------|-------|-----|-----|---------------|
| laymina |          |           |       |     |     | 39602 - 40766 |
| paywuta | OZY564   | ANSTO     | 35070 | 270 | 162 |               |
| laymina |          |           |       |     |     | 39908 - 40720 |
| paywuta | OZT389   | ANSTO     | 35220 | 150 | 172 |               |
| laymina |          |           |       |     |     | 36350 - 37374 |
| paywuta | OZY565   | ANSTO     | 32570 | 200 | 189 |               |
| laymina |          |           |       |     |     | 41943 - 42471 |
| paywuta | OZY566   | ANSTO     | 37910 | 330 | 205 |               |
| laymina |          |           |       |     |     | 41746 - 42418 |
| paywuta | OZY567   | ANSTO     | 37650 | 350 | 211 |               |
| laymina |          |           |       |     |     | 42339 - 43055 |
| paywuta | OZY568   | ANSTO     | 39150 | 410 | 233 |               |
| Emerald | Core top |           | -72   | 1   | 0   | -             |
|         | D-AMS    |           |       |     |     | 307 - 464     |
| Emerald | 047842   | DirectAMS | 359   | 26  | 21  |               |
|         | D-AMS    |           |       |     |     | 928 - 1053    |
| Emerald | 047306   | DirectAMS | 1116  | 24  | 35  |               |
|         | D-AMS    |           |       |     |     | 2150 - 2351   |
| Emerald | 047843   | DirectAMS | 2329  | 26  | 55  |               |
|         | D-AMS    |           |       |     |     | 7431 - 7569   |
| Emerald | 047844   | DirectAMS | 6655  | 23  | 71  |               |
|         | D-AMS    |           |       |     |     | 12740 - 12889 |
| Emerald | 047307   | DirectAMS | 10902 | 34  | 85  |               |
|         | D-AMS    |           |       |     |     | 24263 - 24780 |
| Emerald | 047845   | DirectAMS | 20467 | 49  | 105 |               |
|         | D-AMS    |           |       |     |     | 25792 - 25984 |
| Emerald | 047846   | DirectAMS | 21623 | 53  | 121 |               |
|         | D-AMS    |           |       |     |     | 26386 - 26940 |
| Emerald | 047308   | DirectAMS | 22369 | 78  | 135 |               |
|         | D-AMS    |           |       |     |     | 27481 - 27822 |
| Emerald | 047847   | DirectAMS | 23530 | 61  | 147 |               |
|         | D-AMS    |           |       |     |     | 27397 - 27763 |
| Emerald | 047848   | DirectAMS | 23429 | 59  | 161 |               |
|         | D-AMS    |           |       |     |     | 29247 - 29848 |
| Emerald | 047849   | DirectAMS | 25310 | 64  | 181 |               |
|         | D-AMS    |           |       |     |     | 27289 - 27681 |
| Emerald | 047309   | DirectAMS | 23250 | 84  | 185 |               |
|         | D-AMS    |           |       |     |     | 29216 - 29798 |
| Emerald | 047850   | DirectAMS | 25258 | 63  | 205 |               |
|         | D-AMS    |           |       |     |     | 36563 - 37322 |
| Emerald | 047851   | DirectAMS | 32670 | 113 | 221 |               |
|         | D-AMS    |           |       |     |     | 41438 - 42143 |
| Emerald | 047310   | DirectAMS | 37082 | 244 | 235 |               |
|         | D-AMS    |           |       |     |     | 34286 - 34662 |
| Emerald | 047852   | DirectAMS | 30092 | 92  | 255 |               |
